# Supplementary material for: PAI-1 protein is a key molecular effector in the transition from normal to PTSD-like fear memory
Source: PubMed Central journal article supplement (PMC8589667; doi:10.1038/s41380-021-01024-1), 2021-01-28
Supplement: 41380_2021_1024_MOESM3_ESM.pdf [file 41380_2021_1024_MOESM3_ESM.pdf]

# SUPPLEMENTARY INFORMATION

## **PAI-1 protein is a key molecular effector in the transition from normal to PTSD-like fear memory**

C. Bouarab<sup>1†</sup>, V. Roullot-Lacarrière<sup>1†</sup>, M. Vallée<sup>1</sup>, A. Le Roux<sup>1</sup>, C. Guette<sup>1</sup>, M. Mennesson<sup>1</sup>, A. Marighetto<sup>1</sup>,  
A. Desmedt<sup>1†</sup>, PV. Piazza<sup>1,2†</sup>, JM. Revest<sup>1†\*</sup>.

<sup>1</sup> Univ. Bordeaux, INSERM, Neurocentre Magendie, U1215, F-33000 Bordeaux, France

<sup>2</sup> Current address: Aelis Farma, 33077 Bordeaux, France.

† These authors contributed equally to this work

\* To whom correspondence should be addressed: E-mail: jean-michel.revest@inserm.fr

ORCID ID: 0000-0001-6459-0888

17

## 18 **Supplementary Figure Legends**

19 **Fig. S1** Corticosterone and restraint stress did not modify the expression of total proteins. **(a)** Western Blot  
20 and **(b)** densitometric analysis of  $\alpha$ -tubulin protein expression used as a loading control in PC12 cells in  
21 response to 100 nM and 1000 nM of Cort for 3 h (180 min). **(c)** Western Blot and **(d)** densitometric analyses  
22 of TrkB, Erk1/2<sup>MAPK</sup> and  $\beta$ III-tubulin proteins from dorsal hippocampal slices extracts of Sprague-Dawley  
23 rats incubated with 10 nM and 1000 nM of Cort for 1 h (60 min) and 3 h (180 min). **(e)** Western Blot and **(f)**  
24 densitometric analyses of Erk1/2<sup>MAPK</sup> and  $\beta$ III-tubulin protein expressions used as a loading control from  
25 dorsal hippocampus extracts from C57BL/6J mice in response to 30 min, 1 h (60 min) and 3 h (180 min)  
26 restraint stress. Dunnett's multiple comparisons *post-hoc* test after ANOVA, all  $p$ =ns. Plotted values are means  
27 +/- sem.

28

29 **Fig. S2** The development of PTSD-like memory is not associated with changes in total proteins. Densitometric  
30 analyses of the expression of Erk1/2<sup>MAPK</sup> protein in the dorsal hippocampus at different times after the  
31 conditioning sessions **(a)** and expressed as area under the curve encompassing the 24 h of analysis **(b)**.  
32 Example of the Western Blot used for protein quantification after normalization with the level of  $\beta$ III-tubulin  
33 **(c)**. Immediately after the conditioning session animals received an injection of either vehicle (Veh; NaCl  
34 0.9% i.p., white symbol) or of Cort (2 mg/kg i.p., black symbol). Grey symbol, control animals that were  
35 manipulated but not exposed to conditioning. Student's t-test and Sidak's multiple comparisons *post-hoc* test  
36 after ANOVA, all  $p$ =ns. Plotted values are means +/- sem.

37

38
